# Supplementary material for: Effect of green tea on blood glucose levels and serum proteomic patterns in diabetic (db/db) mice and on glucose metabolism in healthy humans
Source: PubMed Central journal article supplement (PMC517497; doi:10.1186/1471-2210-4-18), 2004-08-26

m/z

Saline

Tea

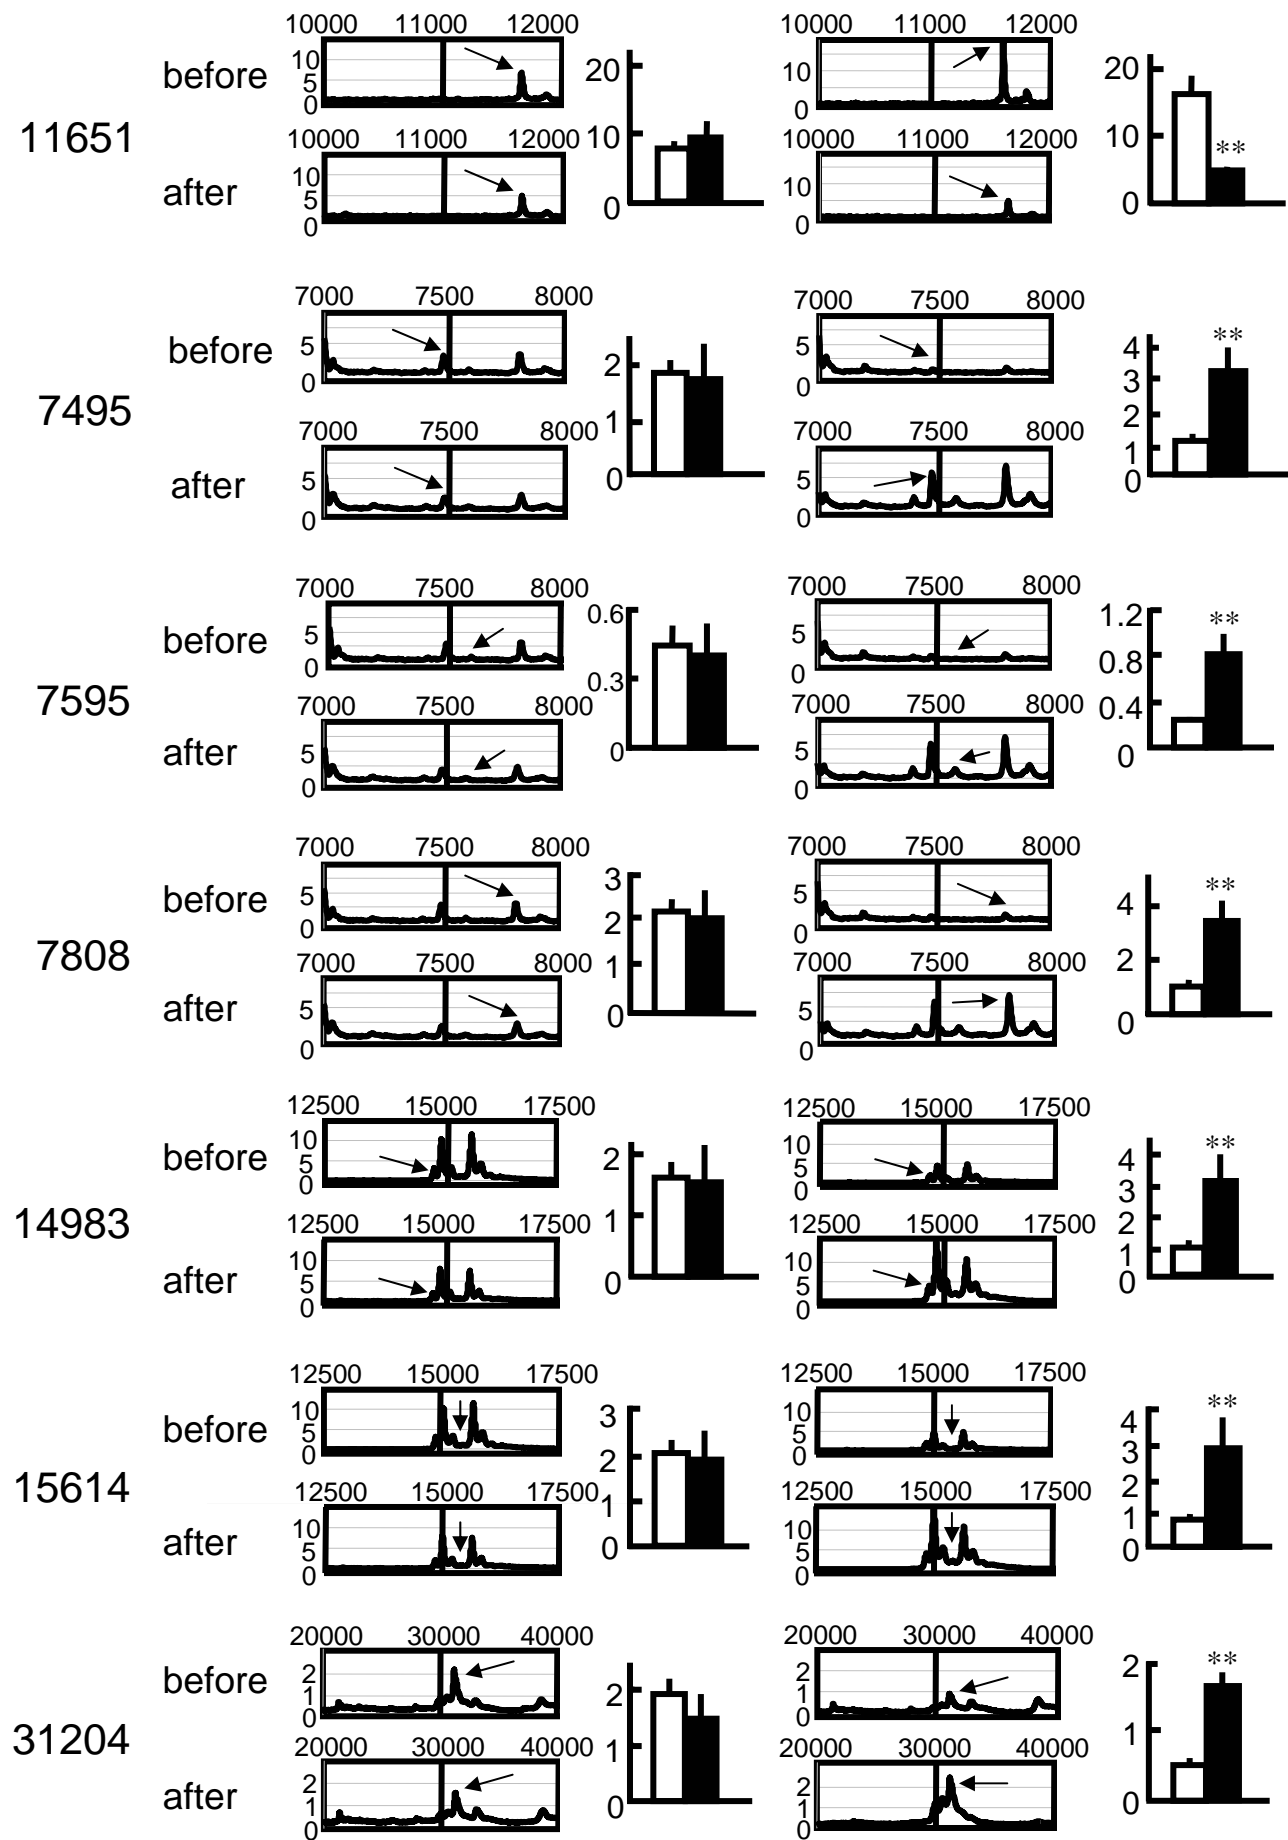

Supplement: 1471-2210-4-18-S2.pdf [file 1471-2210-4-18-S2.pdf]
